# Supplementary material for: Identifying Molecular Changes in Early Cervical Cancer Samples of Patients That Developed Metastasis
Source: PubMed Central journal article supplement (PMC8787153; doi:10.3389/fonc.2021.715077), 2022-01-11
Supplement: DataSheet_1.pdf [file DataSheet_1.pdf]

## *Supplementary Material*

### 1 Supplementary Tables

**Supplementary Table 1** Immunohistochemistry information

| <b>Antibody</b>                 | <b>CD8</b>       | <b>FOXP3</b>     |
|---------------------------------|------------------|------------------|
| <b>Type</b>                     | Anti-Rabbit      | Anti-Mouse       |
| <b>Concentration</b>            | 0.35 µg/ml       | 0.5 µg/ml        |
| <b>Company</b>                  | Ventana          | Thermofisher     |
| <b>Clone</b>                    | SP57             | 236A/E7          |
| <b>Lot number</b>               | Y04591           | 4339062          |
| <b>Procedure</b>                | Optiview CC1 16' | Optiview CC1 32' |
| <b>Antibody incubation time</b> | 32 minutes       | 32 minutes       |

Supplementary Table 2 Cell type-specific marker genes for immune cells

| Cell name                                                 | Marker genes               | CCNR |       | CCLR |       | CCDR |       | HC        |       |
|-----------------------------------------------------------|----------------------------|------|-------|------|-------|------|-------|-----------|-------|
|                                                           |                            | C    | Slope | C    | Slope | C    | Slope | C         | Slope |
| <b>CD80<sup>+</sup>/CD86<sup>+</sup><br/>Macrophages</b>  | <i>CD80/CD86</i>           | 0.85 | 0.81  | 0.78 | 1.12  | 0.96 | 0.77  | 0.88      | 0.71  |
| <b>CD163<sup>+</sup>/MRC1<sup>+</sup><br/>Macrophages</b> | <i>CD163/MRC1</i>          | 0.65 | 0.84  | 0.66 | 1.06  | 0.83 | 0.61  | 0.52      | 0.64  |
| <b>Plasma B-cells</b>                                     | <i>CD27/CD38</i>           | 0.82 | 0.87  | 0.69 | 0.92  | 0.61 | 0.67  | 0.28      | 0.32  |
|                                                           | <i>CD27/SLAMF7</i>         | 0.90 | 0.94  | 0.95 | 0.86  | 0.94 | 1.14  | 0.92      | 0.66  |
|                                                           | <i>SLAMF7/CD38</i>         | 0.91 | 0.88  | 0.70 | 0.47  | 0.71 | 0.78  | 0.23      | 0.14  |
| <b>CD4<sup>+</sup> T-cells</b>                            | <i>CD4/SELL</i>            | 0.79 | 0.97  | 0.63 | 0.92  | 0.84 | 1.35  | 0.61      | 1.34  |
| <b>Neutrophils</b>                                        | <i>CSF3R/FPR1</i>          | 0.77 | 0.66  | 0.91 | 0.84  | 0.95 | 0.93  | 0.77      | 0.68  |
|                                                           | <i>FPR1/FCGR3a/b</i>       | 0.77 | 0.43  | 0.84 | 0.69  | 0.89 | 0.39  | 0.88      | 1.06  |
|                                                           | <i>CSF3R/<br/>FCGR3a/b</i> | 0.51 | 0.76  | 0.81 | 0.79  | 0.82 | 0.37  | 0.76      | 1.03  |
| <b>Monocytes</b>                                          | <i>TLR2/CD14</i>           | 0.69 | 0.73  | 0.83 | 0.68  | 0.61 | 0.53  | 0.18      | 0.38  |
|                                                           | <i>TLR2/TLR4</i>           | 0.72 | 0.67  | 0.83 | 0.76  | 0.71 | 0.78  | 0.39      | 0.62  |
|                                                           | <i>TLR4/CD14</i>           | 0.88 | 0.77  | 0.88 | 0.97  | 0.84 | 1.06  | 0.39      | 0.3   |
| <b>Tregs</b>                                              | <i>FoxP3a/IL2RA</i>        | 0.73 | 0.71  | 0.75 | 0.62  | 0.90 | 0.80  | 0.95      | 0.92  |
| <b>CD45<sup>+</sup><br/>lymphocytes</b>                   | <i>CD45RO/PTPRC</i>        | 0.95 | 1.04  | 0.98 | 0.88  | 0.99 | 1.04  | 0.97      | 1     |
| <b>CD8<sup>+</sup> T-cells</b>                            | <i>CD8A/CD8B</i>           | 0.68 | 0.62  | 0.73 | 0.74  | 0.62 | 0.63  | -<br>0.14 | -0.13 |
| <b>NK cells</b>                                           | <i>XCL1/2/NRC1</i>         | 0.72 | 1.12  | 0.32 | 0.38  | 0.84 | 0.77  | 0.89      | 1.57  |
| <b>T-cells</b>                                            | <i>CD6/CD3G</i>            | 0.80 | 0.91  | 0.57 | 0.62  | 0.92 | 0.90  | 0.94      | 0.96  |
|                                                           | <i>CD6/SH2D1A</i>          | 0.84 | 1.24  | 0.82 | 0.83  | 0.97 | 1.09  | 0.97      | 1.12  |
|                                                           | <i>CD6/TRAT1</i>           | 0.77 | 1.03  | 0.86 | 0.84  | 0.90 | 0.84  | 0.91      | 0.74  |
|                                                           | <i>CD6/CD3E</i>            | 0.89 | 1.03  | 0.70 | 0.72  | 0.94 | 0.69  | 0.71      | 0.69  |
|                                                           | <i>CD3G/SH2D1A</i>         | 0.92 | 1.18  | 0.87 | 0.81  | 0.96 | 1.09  | 0.92      | 1.03  |
|                                                           | <i>CD3G/TRAT1</i>          | 0.91 | 1.07  | 0.79 | 0.71  | 0.94 | 0.90  | 0.98      | 0.79  |
|                                                           | <i>CD3G/CD3E</i>           | 0.93 | 0.95  | 0.91 | 0.86  | 0.94 | 0.69  | 0.67      | 0.64  |
|                                                           | <i>SH2D1A/TRAT1</i>        | 0.96 | 0.88  | 0.87 | 0.84  | 0.96 | 0.81  | 0.88      | 0.63  |
|                                                           | <i>SH2D1A/CD3E</i>         | 0.95 | 0.74  | 0.90 | 0.91  | 0.94 | 0.62  | 0.88      | 0.61  |
| <i>TRAT1/CD3E</i>                                         | 0.95                       | 0.82 | 0.78  | 0.82 | 0.91  | 0.70 | 0.64  | 0.76      |       |

2 Supplementary Figures

Immunohistochemistry positive and negative controls

CD8+

FOXP3+

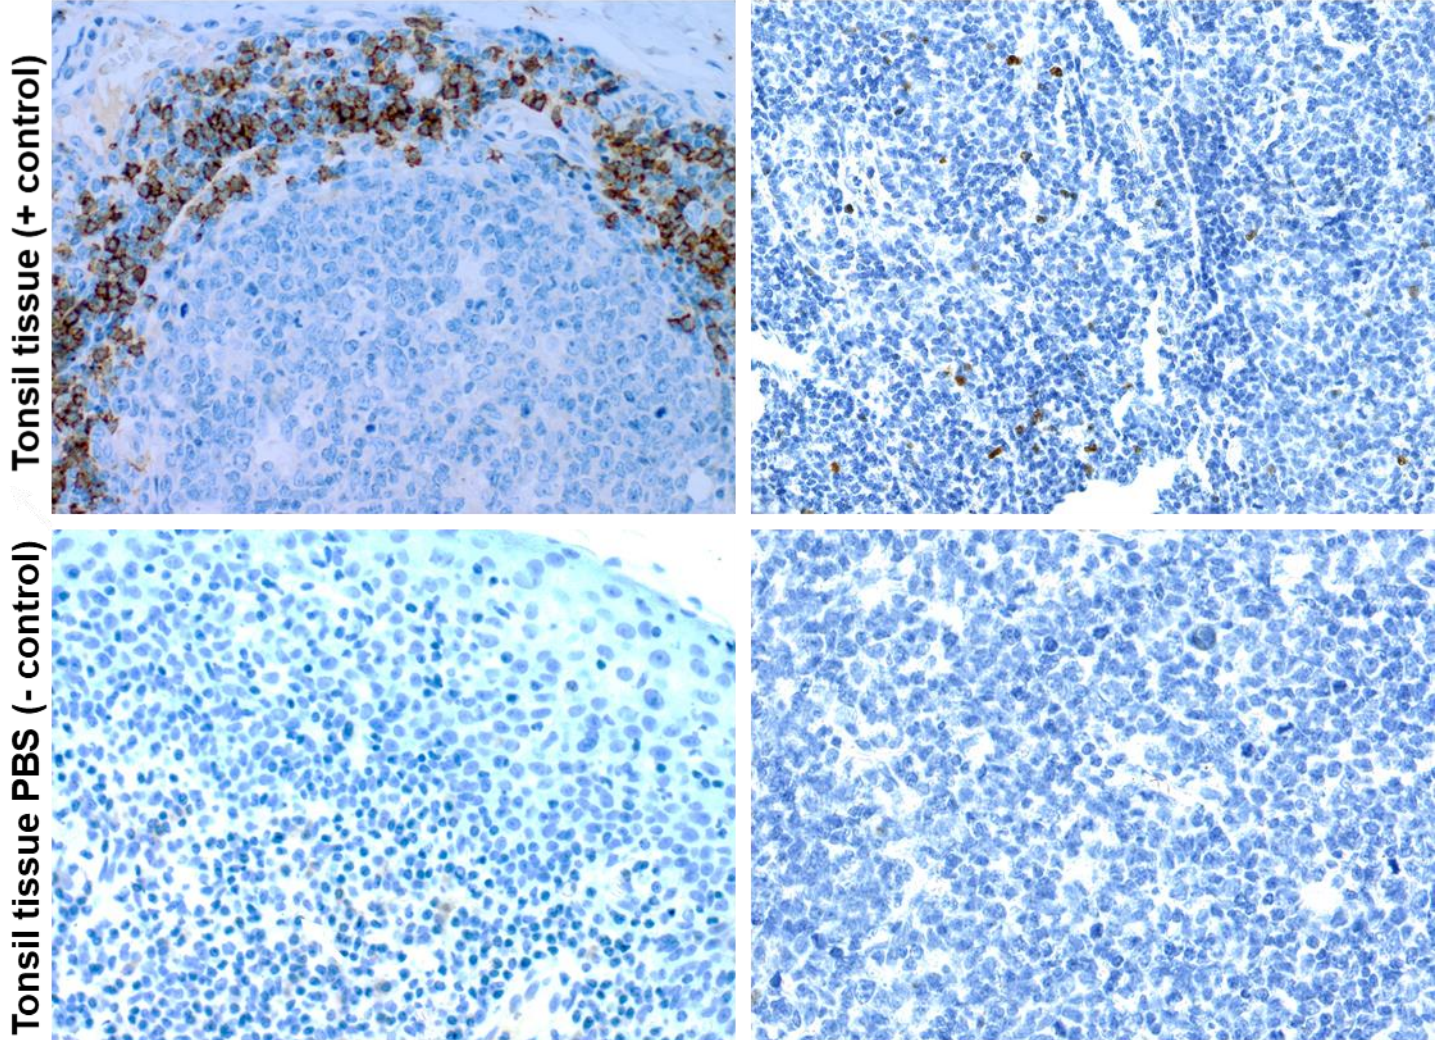

**Supplementary Figure 1.** Representative images for immunohistochemical staining of CD8 and FOXP3 in tonsil tissue (positive control) and tonsil tissue treated with PBS (negative control).

## Gene expression alterations in CCLR

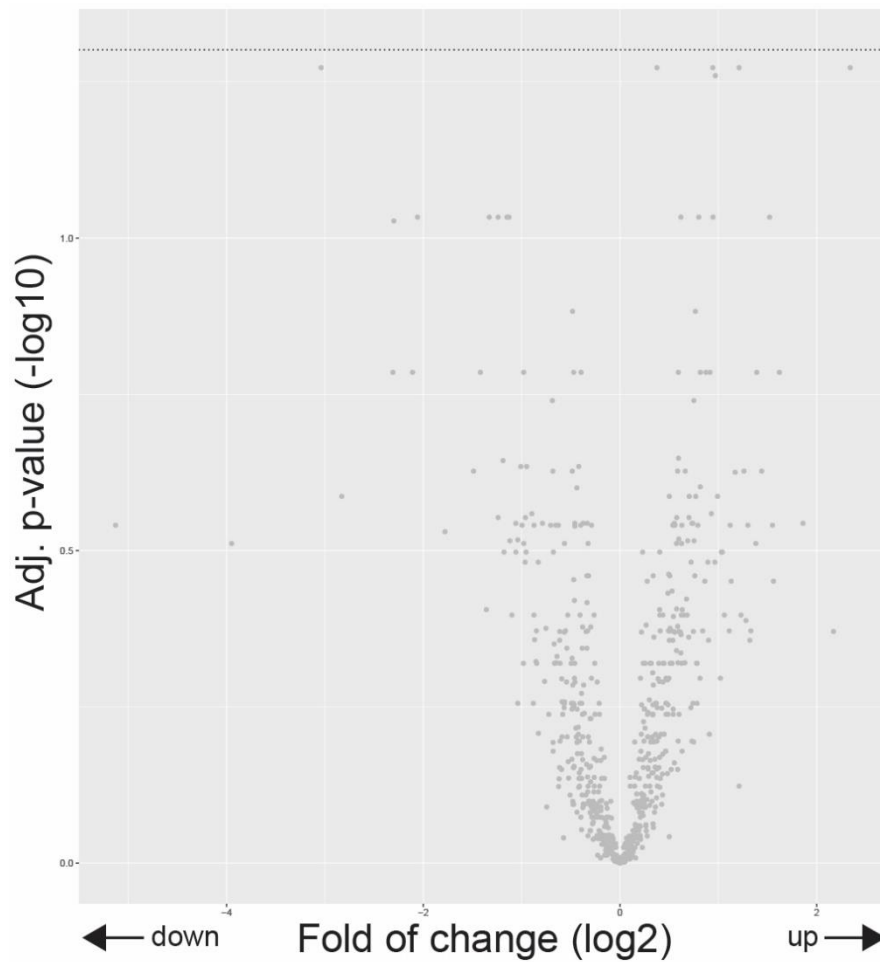

**Supplementary Figure 2.** Volcano plot showing over- and underexpressed genes in CCLR. Each dot represents a gene of the nCounter® PanCancer IO 360 Gene Expression Panel. Y-axis: p-values after the Benjamini-Hochberg procedure ( $-\log_{10}$  scale). X-axis: Fold of change is calculated with CCNR as baseline reference ( $\log_2$  ratio). Arrows indicate up- or downregulation. CCNR: Cervical cancer no recurrence; CCLR: Cervical cancer local recurrence.

### Density of FoxP3+ cells in cervical cancer tissues and healthy controls

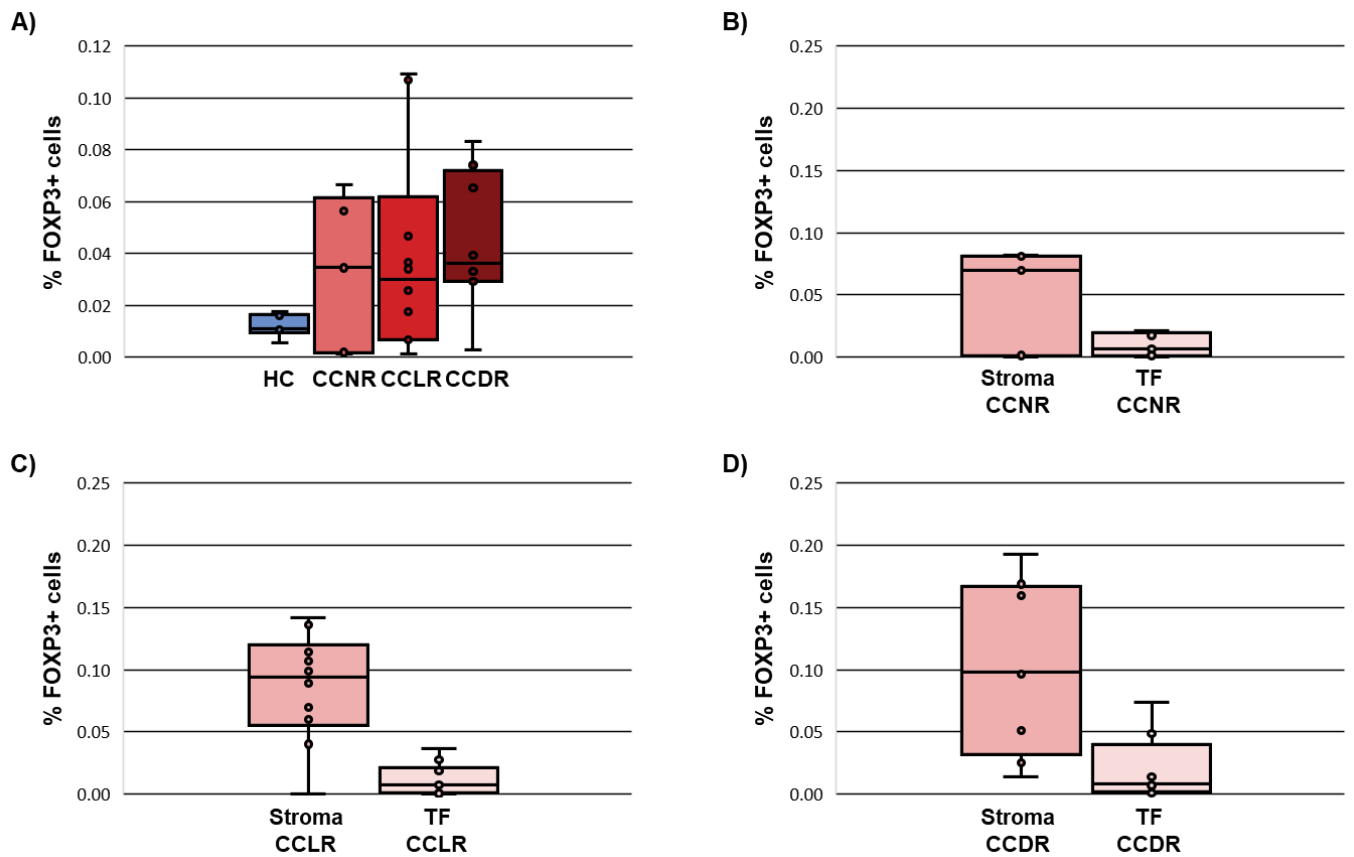

**Supplementary Figure 3.** The percentage of FoxP3+ cells is calculated according to surface FoxP3+ cells/surface of all cells \*100. A) Density FoxP3+ cells in all groups. B) Density FoxP3+ cells in CCNR comparing stromal tissue and tumor fields. C) Density FoxP3+ cells in CCLR comparing stromal tissue and tumor fields. D) Density FoxP3+ cells in CCDR comparing stromal tissue and tumor fields. TF: Tumor fields; HC: Healthy controls; CCLR: Cervical cancer local recurrence; CCDR: Cervical cancer distant recurrence; CCNR: Cervical cancer no recurrence

## Expression of marker genes FoxP3 and IL2RA

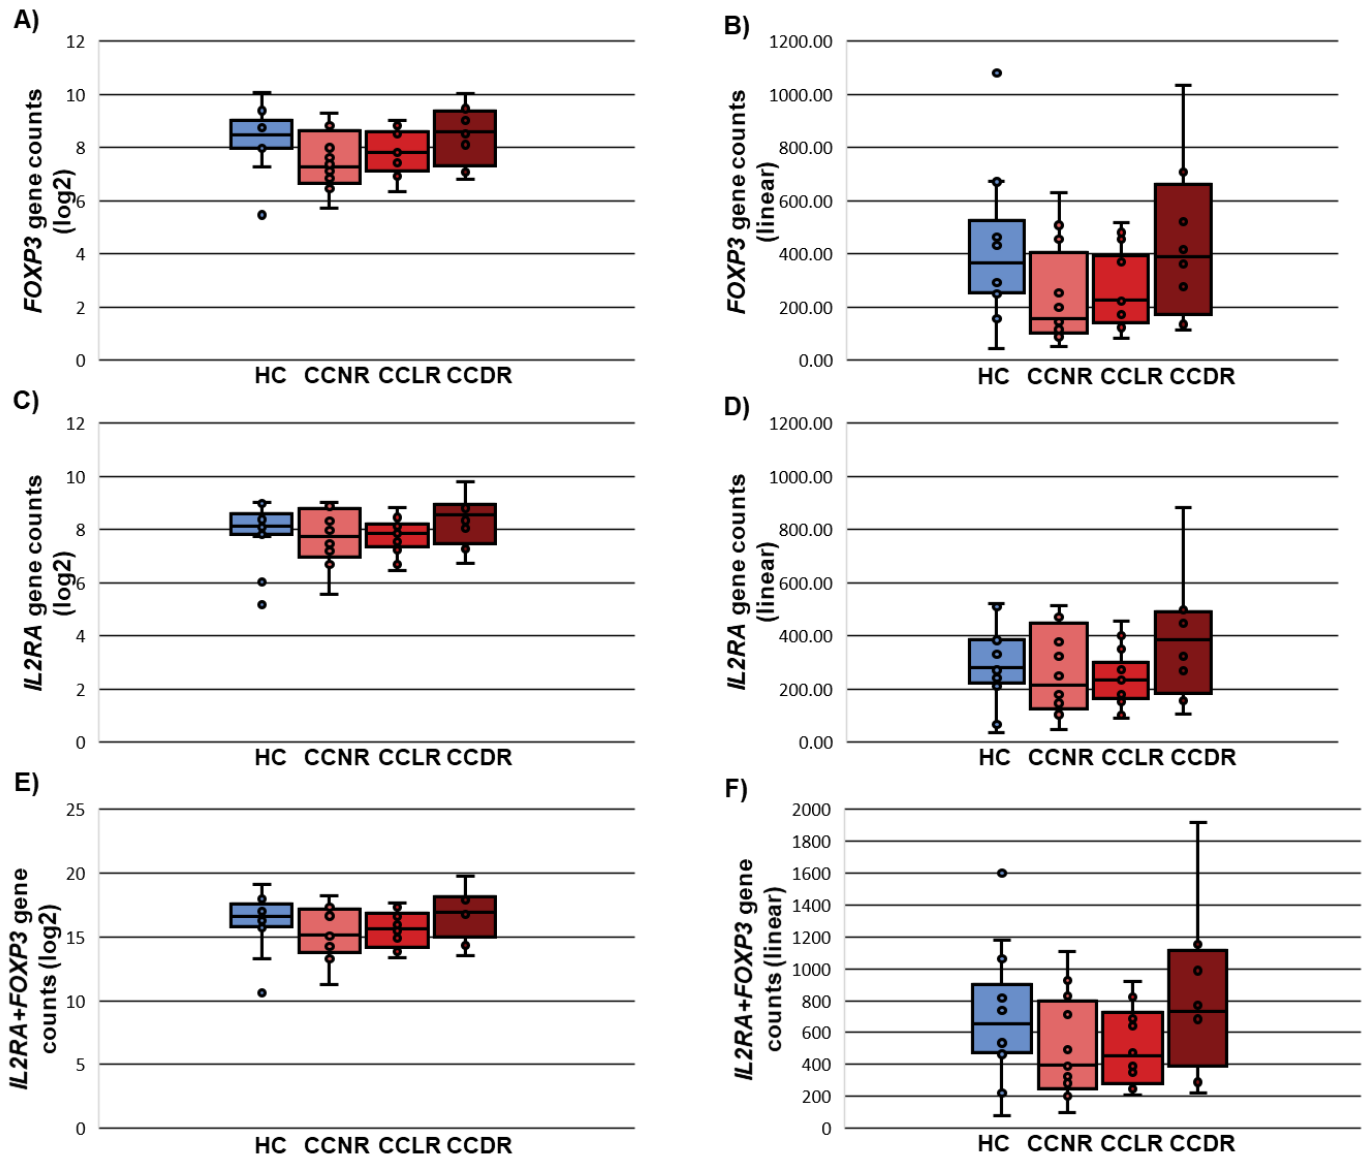

**Supplementary Figure 4.** The gene counts for FoxP3 and IL2RA are shown in both linear and log<sub>2</sub> scales for all study groups. A) FoxP3 gene counts in log<sub>2</sub>-scale. B) FoxP3 gene counts in linear scale. C) IL2RA gene counts in log<sub>2</sub>-scale. D) IL2RA gene counts in a linear scale. E) Sum of FoxP3 and IL2RA gene counts in log<sub>2</sub>-scale. F) Sum of FoxP3 and IL2RA gene counts in linear scale. HC: Healthy controls; CCLR: Cervical cancer local recurrence; CCNR: Cervical cancer no recurrence; CCDR: Cervical cancer distant recurrence

### Summary of the TCGA cervical cancer data

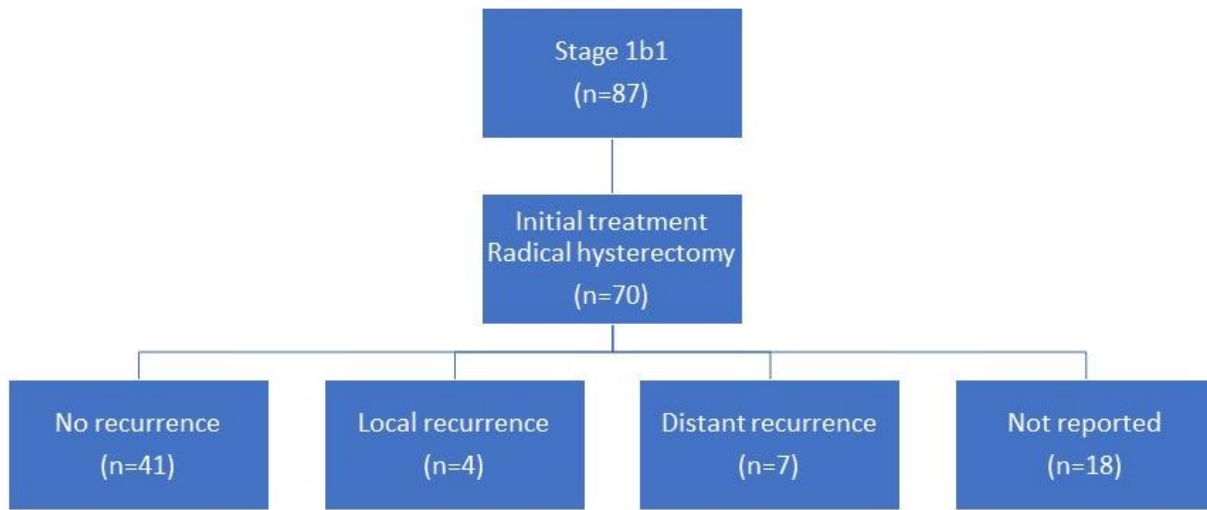

**Supplementary Figure 5:** The number of cervical cancer samples available in the TCGA data.
